# Supplementary material for: Rebound of HBV DNA after cessation of nucleos/tide analogues in chronic hepatitis B patients with undetectable covalently closed
Source: PubMed Central journal article supplement — JHEP Rep. 2020 Mar 29;2(3):100112. doi: 10.1016/j.jhepr.2020.100112 (PMC7242874; doi:10.1016/j.jhepr.2020.100112), 2020-03-29
Supplement: mmc1.pdf [file mmc1.pdf]

## JHEP Reports

### CTAT methods

Tables for a “Complete, Transparent, Accurate and Timely account” (CTAT) are now mandatory for all revised submissions. The aim is to enhance the reproducibility of methods.

- Only include the parts relevant to your study
- Refer to the CTAT in the main text as ‘Supplementary CTAT Table’
- Do not add subheadings
- Add as many rows as needed to include all information
- Only include one item per row

If the CTAT form is not relevant to your study, please outline the reasons why:

|  |
|--|
|  |
|--|

#### 1.1 Antibodies

| Name | Citation | Supplier | Cat no. | Clone no. |
|------|----------|----------|---------|-----------|
|      |          |          |         |           |

#### 1.2 Cell lines

| Name | Citation | Supplier | Cat no. | Passage no. | Authentication test method |
|------|----------|----------|---------|-------------|----------------------------|
|      |          |          |         |             |                            |

#### 1.3 Organisms

| Name | Citation | Supplier | Strain | Sex | Age | Overall n number |
|------|----------|----------|--------|-----|-----|------------------|
|      |          |          |        |     |     |                  |

#### 1.4 Sequence based reagents

| Name | Sequence | Supplier |
|------|----------|----------|
|      |          |          |

#### 1.5 Biological samples

| Description          | Source                       | Identifier |
|----------------------|------------------------------|------------|
| Human plasma samples | Chronic hepatitis B patients |            |

#### 1.6 Deposited data

| Name of repository | Identifier | Link |
|--------------------|------------|------|
|                    |            |      |

## 1.7 Software

| Software name       | Manufacturer | Version |
|---------------------|--------------|---------|
| IBM SPSS Statistics | IBM          | 25      |

## 1.8 Other (e.g. drugs, proteins, vectors etc.)

|                              |                             |  |
|------------------------------|-----------------------------|--|
| COBAS HBV Test               | Roche Molecular Diagnostics |  |
| Lumipulse HBcrAg Assay       | Fujirebio Inc               |  |
| Elecsys HBsAg II Quant Assay | Roche Diagnostics           |  |
|                              |                             |  |

## 1.9 Please provide the details of the corresponding methods author for the manuscript:

Danny Ka-Ho Wong, Department of Medicine, The University of Hong Kong, Room 06-042, Block T, Queen Mary Hospital, Hong Kong. Phone: +852 2255-2736; Fax: +852 2817-3578. Email: danywong@hku.hk

## 2.0 Please confirm for randomised controlled trials all versions of the clinical protocol are included in the submission. These will be published online as supplementary information.

|  |
|--|
|  |
|--|
